# Supplementary material for: Ag2S/g-C3N4 composite photocatalysts for efficient Pt-free hydrogen production. The co-catalyst function of Ag/Ag2S formed by simultaneous photodeposition
Source: Royal Society of Chemistry journal article supplement (doi:10.1039/c3dt53526f), 2014-01-01
Supplement: c3dt53526f.pdf [file c3dt53526f.pdf]

## **Electronic Supplementary Information**

# **Ag<sub>2</sub>S/g-C<sub>3</sub>N<sub>4</sub> Composite Photocatalysts for Efficient Pt-free Hydrogen Production. The Co-catalyst Function of Ag/Ag<sub>2</sub>S Formed by Simultaneous Photodeposition**

Deli Jiang,\* Linlin Chen, Jimin Xie, and Min Chen\*

*School of Chemistry and Chemical Engineering, Jiangsu University, Zhenjiang  
212013, China*

\* Corresponding author:

E-mail address: dlj@ujs.edu.cn, chenmin3226@sina.com.

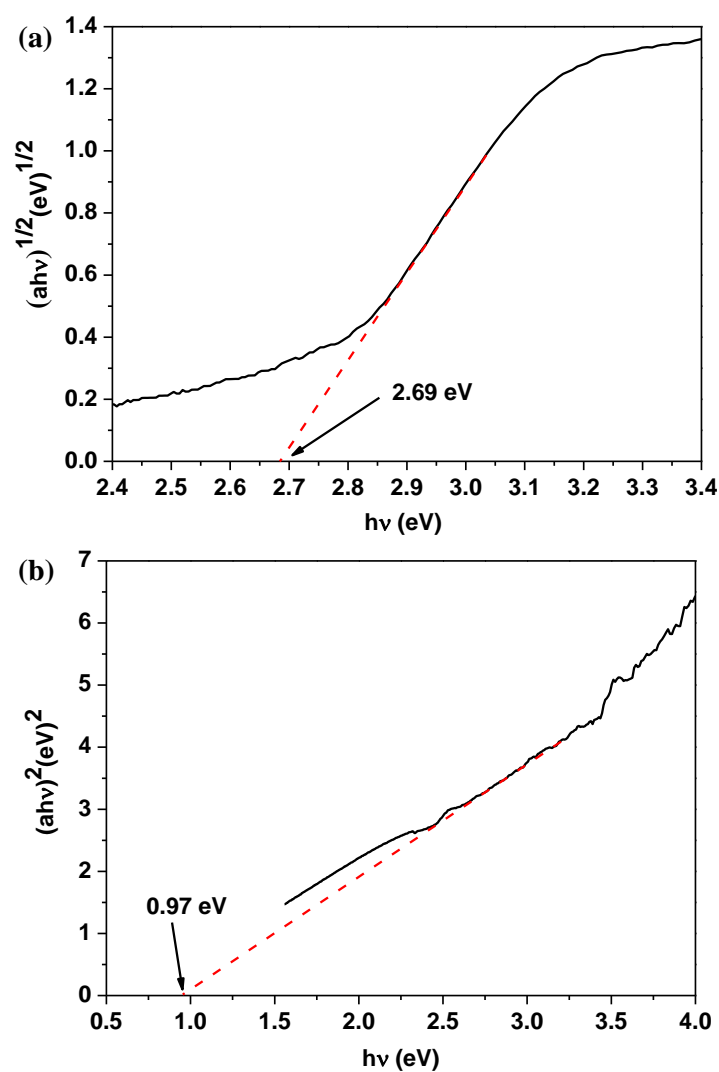

**Fig. S1.** (a) Plot of  $(\alpha h\nu)^{1/2}$  versus energy ( $h\nu$ ) for the band gap energy of  $g\text{-C}_3\text{N}_4$  and  
(b) the plot of  $(\alpha h\nu)^2$  versus energy ( $h\nu$ ) for the band gap energy of  $\text{Ag}_2\text{S}$ .

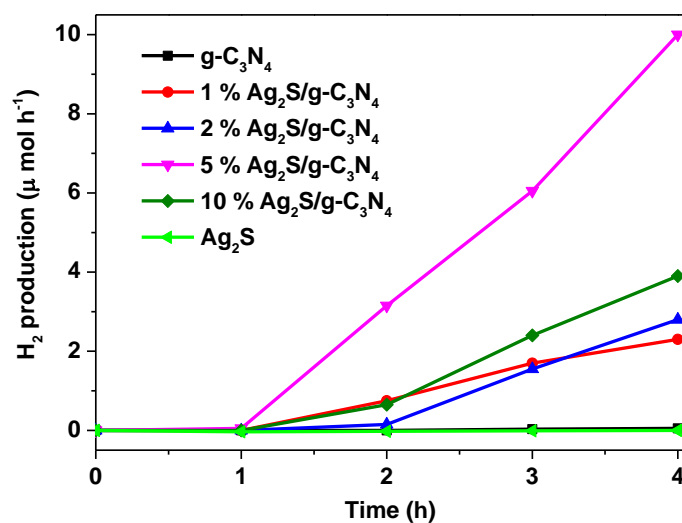

**Fig. S2.** Time course of H<sub>2</sub> evolution from 25% methanol aqueous solution (20 mL methanol + 60 mL distilled water) over Ag<sub>2</sub>S/g-C<sub>3</sub>N<sub>4</sub> composites as well as pure g-C<sub>3</sub>N<sub>4</sub> and Ag<sub>2</sub>S samples.

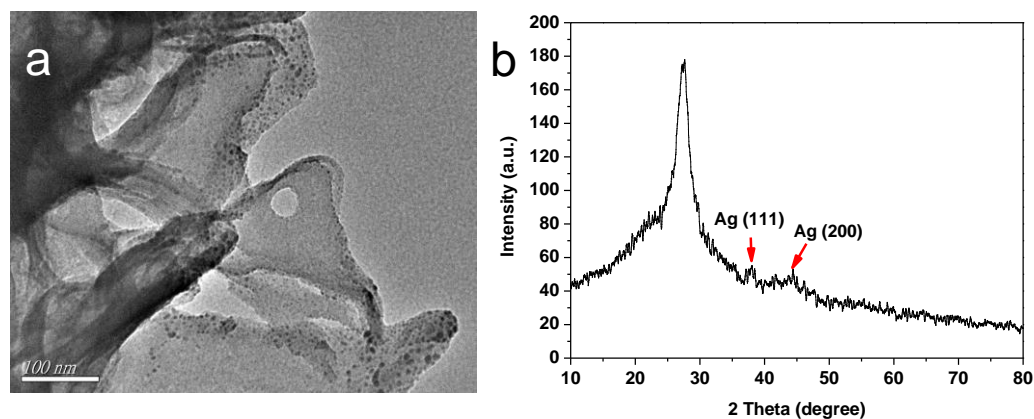

**Fig. S3.** (a) TEM image and (b) XRD pattern of Ag/g-C<sub>3</sub>N<sub>4</sub> composite.

**Synthesis of Ag/g-C<sub>3</sub>N<sub>4</sub> composite:** Ag/g-C<sub>3</sub>N<sub>4</sub> composite photocatalysts were prepared by photoreduction method. Typically, 0.05 g of g-C<sub>3</sub>N<sub>4</sub> powders and 0.05 g of AgNO<sub>3</sub> were dispersed in 50 mL water. The solution was then irradiated under

Xenon lamp (300 W) for 5 h. The product was collected by centrifugation, washed with distilled water and absolute ethanol, and dried in an oven at 60 °C for 12h.

**Table S1.** Measured N<sub>2</sub> sorption parameters for the different samples

| Sample                                                 | Surface area<br>(m <sup>2</sup> ·g <sup>-1</sup> ) | Pore volume<br>(cm <sup>3</sup> ·g <sup>-1</sup> ) |
|--------------------------------------------------------|----------------------------------------------------|----------------------------------------------------|
| g-C <sub>3</sub> N <sub>4</sub>                        | 17.2296                                            | 0.01456                                            |
| 1 % Ag <sub>2</sub> S/g-C <sub>3</sub> N <sub>4</sub>  | 13.2470                                            | 0.01500                                            |
| 2 % Ag <sub>2</sub> S/g-C <sub>3</sub> N <sub>4</sub>  | 17.2487                                            | 0.01209                                            |
| 5 % Ag <sub>2</sub> S/g-C <sub>3</sub> N <sub>4</sub>  | 13.0188                                            | 0.01577                                            |
| 10 % Ag <sub>2</sub> S/g-C <sub>3</sub> N <sub>4</sub> | 12.7641                                            | 0.01512                                            |
